# Supplementary material for: 8-Oxo-7,8-dihydro-2′-deoxyguanosine and abasic site tandem lesions are oxidation prone yielding hydantoin products that strongly destabilize duplex DNA
Source: Royal Society of Chemistry journal article supplement (doi:10.1039/c7ob02096a), 2017-01-01
Supplement: c7ob02096a1.pdf [file c7ob02096a1.pdf]

## Electronic Supplementary Information

### 8-Oxo-7,8-dihydro-2'-deoxyguanosine and abasic site tandem lesions are oxidation prone yielding hydantoin products that strongly destabilize duplex DNA

Aaron M. Fleming and Cynthia J. Burrows\*

Department of Chemistry, University of Utah

315 S 1400 East, Salt Lake City, UT 84112-0850, USA

\*Corresponding author. E-mail address: [burrows@chem.utah.edu](mailto:burrows@chem.utah.edu)

| <b>Item</b>                                                                                        | <b>Page</b> |
|----------------------------------------------------------------------------------------------------|-------------|
| <b>Figure 1.</b> Method to determine dOG oxidation products in dsODNs                              | S2          |
| <b>Figure 2.</b> Products observed with F in the complementary strand to dOG (O)                   | S3          |
| <b>Figure 3.</b> Ratios of the dSp diastereomers with F in the complementary strand to dOG (O)     | S4          |
| <b>Figure 4.</b> Method to measure the context dependency in the relative reactivity of dOG (O)    | S5          |
| <b>Figure 5.</b> Example HPLC traces showing purity of a ssODN with OG, dGh, or the<br>dSp isomers | S6          |

**Figure 1.** Method to determine dOG oxidation products in dsODNs

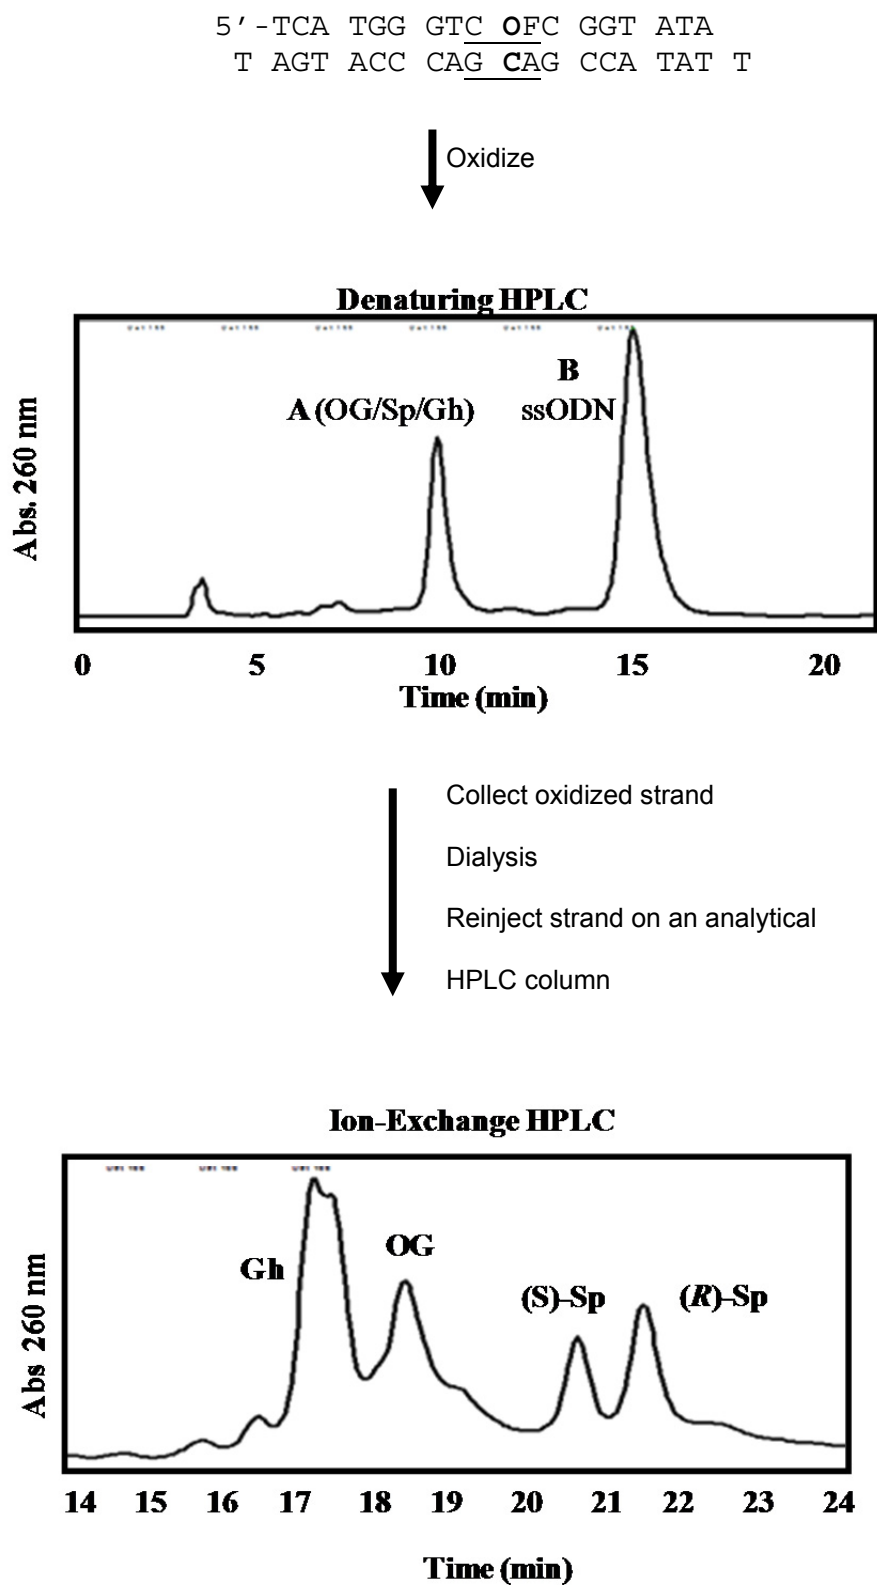

**Figure 2.** Products observed with F in the complementary strand to dOG (O)

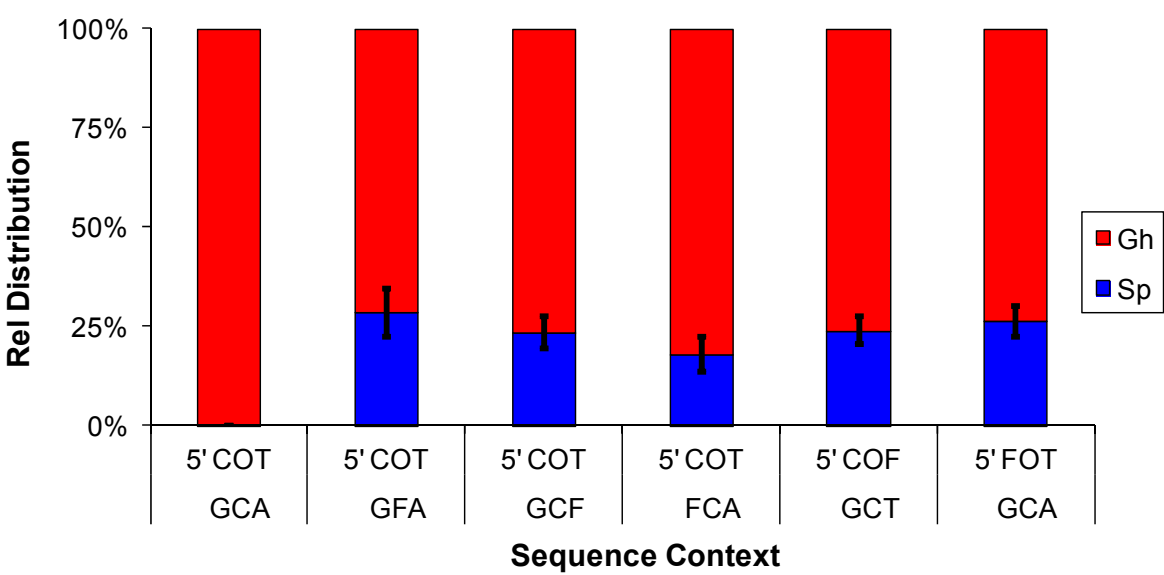

**Figure 3.** Ratios of the dSp diastereomers with F in the complementary strand to dOG (O)

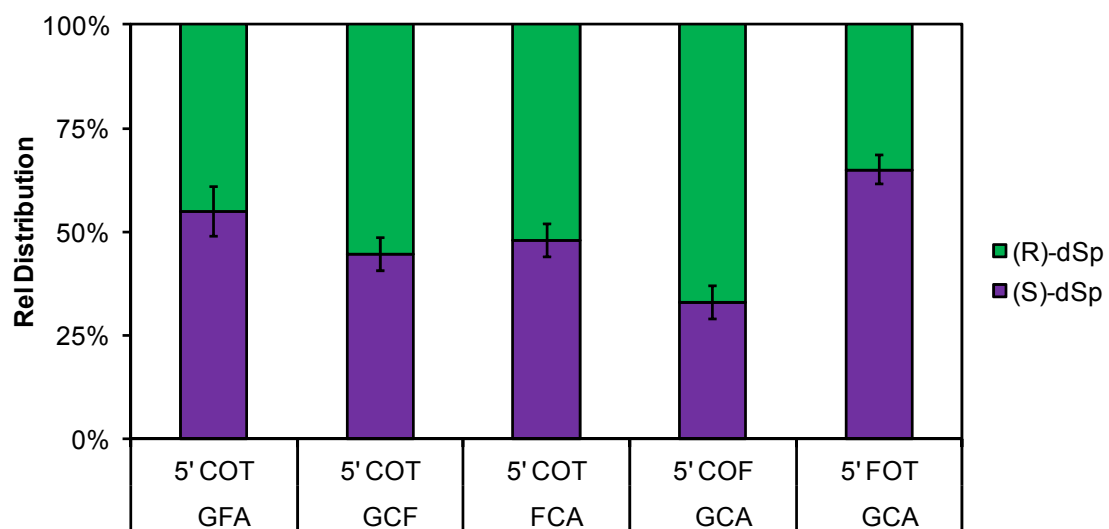

**Figure 4.** Method to measure the context dependency in the relative reactivity of dOG (O)

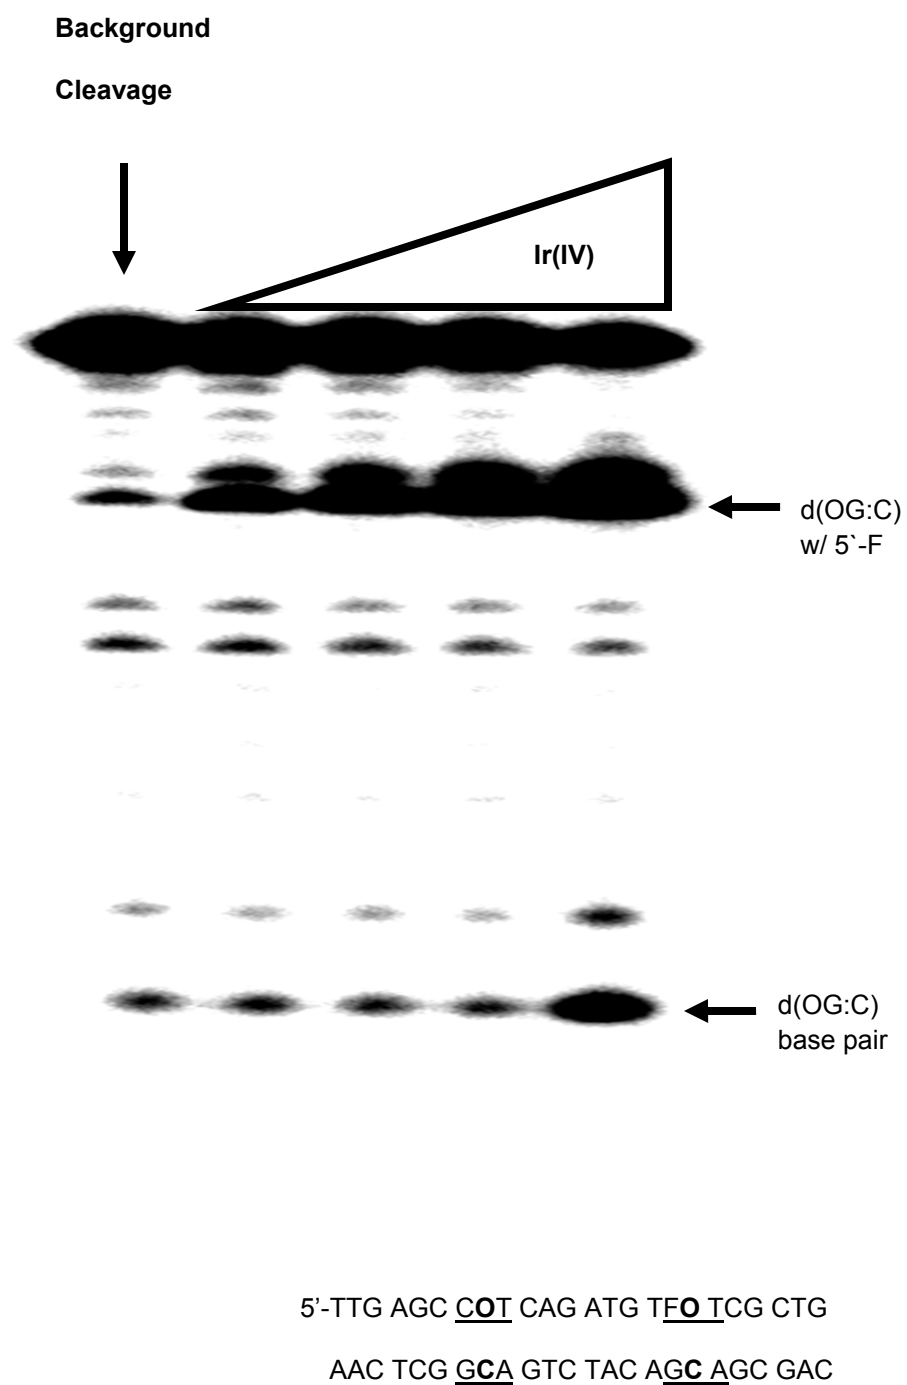

**Figure 5.** Example HPLC traces showing purity of a ssODN with dOG, dGh, or the dSp isomers

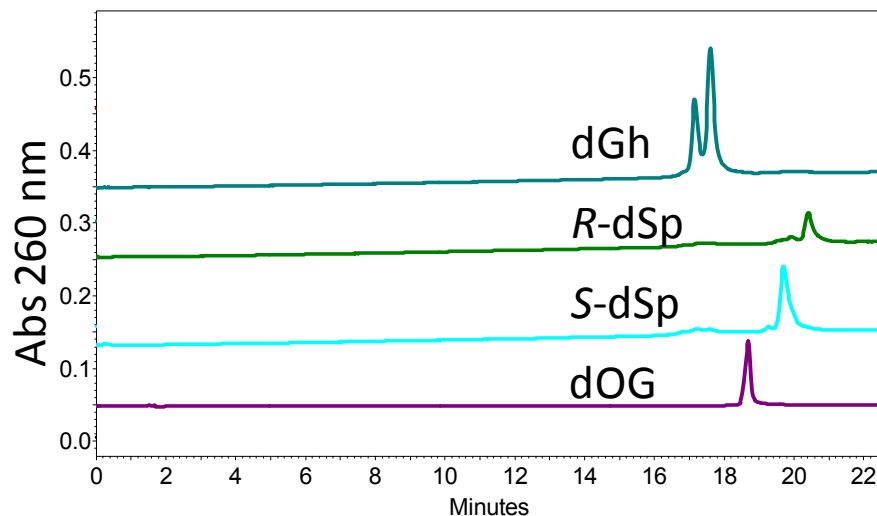

The traces are for the sequence 5'- TC ATG GGT FXT CGG TAT A-3' where X = dOG, dGh, (S)-dSp, or (R)-dSp.

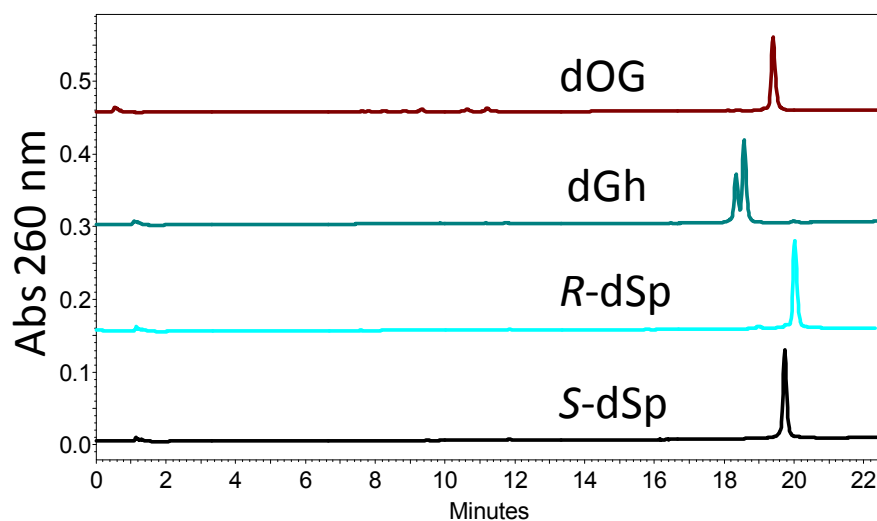

The traces are for the sequence 5'- TC ATG GGT CXF CGG TAT A-3' where X = dOG, dGh, (S)-dSp, or (R)-dSp.
